# Supplementary material for: Maintenance of physical activity after cardiac rehabilitation (FAIR): study protocol for a feasibility trial
Source: HighWire-hosted journal article supplement (doi:10.1136/bmjopen-2021-060157), 2022-04-01
Supplement: bmjopen-2021-060157supp001_data_supplement.pdf [file bmjopen-2021-060157supp001_data_supplement.pdf]

| <b>Supplementary table 1. Outcome measures and patient demographics</b>                |                                                                                                                   |                              |
|----------------------------------------------------------------------------------------|-------------------------------------------------------------------------------------------------------------------|------------------------------|
| <b>FEASIBILITY OUTCOMES</b>                                                            |                                                                                                                   |                              |
| <b>Outcomes</b>                                                                        | <b>Instruments</b>                                                                                                | <b>Timing of measurement</b> |
| Recruitment*                                                                           | Number of screened, eligible, and included patients                                                               | Screening, Baseline          |
| End date of rehabilitation program                                                     | Registered by assessor                                                                                            | Baseline                     |
| Accelerometer data completeness*                                                       | Number of completing participants with sufficient data                                                            | Baseline, 3 months           |
| Response rate on patient reported outcomes*                                            | Number of participants returning patient reported outcomes                                                        | Baseline, 3 months           |
| Start/end date of participation                                                        | Registered by assessor                                                                                            | Baseline, 3 months           |
| Time spent on starting the intervention (creation of action plans, setting up texts)   | Registered by assessor                                                                                            | Baseline                     |
| Attrition/retention*                                                                   | Number of withdrawals, reasons for withdrawal                                                                     | Continuous, 3 months         |
| Coordinator time spent, minutes per participant throughout the intervention*           | Registered by coordinator                                                                                         | Continuous                   |
| Response rate (adherence) to weekly follow-up messages ( <b>Message 2, Figure 4</b> )* | Number of times responded to messages, number of messages sent                                                    | Continuous                   |
| Response rate on follow-up messages asking about contact ( <b>Figure 4</b> )           | Number of times responded, number of messages sent                                                                | Continuous                   |
| Coordinator actions                                                                    | Registered by coordinator: number of times receiving phone call from coordinator; actions taken by coordinator    | Continuous                   |
| Acceptability of text message component*                                               | Single item: "Would you participate in a project with weekly text messages again if given the chance to do over?" | 3 months                     |
| <b>CLINICALLY ASSESSED OUTCOMES (planned RCT outcomes)</b>                             |                                                                                                                   |                              |
| <b>Outcomes</b>                                                                        | <b>Instruments</b>                                                                                                | <b>Timing of measurement</b> |
| Height                                                                                 | Stadiometer                                                                                                       | Baseline                     |
| Moderate-to-vigorous physical activity (min/week)                                      | Accelerometer                                                                                                     | Baseline, 3 months           |
| Total physical activity (MET-minutes/week)                                             | Accelerometer                                                                                                     | Baseline, 3 months           |
| Moderate-intensity physical activity (min/week)                                        | Accelerometer                                                                                                     | Baseline, 3 months           |
| Vigorous-intensity physical activity (min/week)                                        | Accelerometer                                                                                                     | Baseline, 3 months           |
| Light-intensity physical activity (min/week)                                           | Accelerometer                                                                                                     | Baseline, 3 months           |
| Sedentary time (min/day)                                                               | Accelerometer                                                                                                     | Baseline, 3 months           |
| Meeting recommendations for physical activity (yes/no)                                 | Accelerometer                                                                                                     | Baseline, 3 months           |

|                                                                                         |                                                                                   |                              |
|-----------------------------------------------------------------------------------------|-----------------------------------------------------------------------------------|------------------------------|
| Physical function                                                                       | 6 Minute Walking Test;<br>30-second sit-to-stand test                             | Baseline, 3 months           |
| Weight                                                                                  | Scales                                                                            | Baseline, 3 months           |
| <b>PATIENT-REPORTED OUTCOMES (planned RCT outcomes)</b>                                 |                                                                                   |                              |
| <b>Outcomes</b>                                                                         | <b>Instruments</b>                                                                | <b>Timing of measurement</b> |
| Self-reported physical activity                                                         | International Physical Activity Questionnaire (IPAQ)                              | Baseline, 3 months           |
| Health-related quality of life                                                          | EQ-5D-5L;<br>HeartQOL                                                             | Baseline, 3 months           |
| Comorbidity                                                                             | Disease Burden: Morbidity Assessment by Self-Report                               | Baseline, 3 months           |
| Anxiety and depression                                                                  | Hospital Anxiety and Depression Scale (HADS)                                      | Baseline, 3 months           |
| Physical function, self-reported                                                        | WHODAS 2.0 12-item version                                                        | Baseline, 3 months           |
| Self-efficacy of managing chronic disease                                               | 6-item scale                                                                      | Baseline, 3 months           |
| Importance of being physically active                                                   | Purpose-designed item(s)                                                          | Baseline, 3 months           |
| Motivational self-efficacy                                                              | 2-item questionnaire, HAPA (40)                                                   | Baseline, 3 months           |
| Coping self-efficacy                                                                    | 2-item questionnaire, HAPA (40)                                                   | Baseline, 3 months           |
| Recovery self-efficacy                                                                  | 2-item questionnaire, HAPA (40)                                                   | Baseline, 3 months           |
| Perceived COVID limitations to physical activity                                        | Purpose-designed item(s)                                                          | 3 months                     |
| Participant experience/satisfaction                                                     | Purpose-designed item(s)                                                          | 3 months                     |
| Other treatment during intervention period: rehabilitation; exercise; physical activity | Purpose-designed item(s)                                                          | 3 months                     |
| Types of physical activities undertaken                                                 | Purpose-designed item(s)                                                          | 3 months                     |
| Frequency reading text messages                                                         | Purpose-designed item(s)                                                          | 3 months                     |
| Hospitalization; Cause of hospitalization; Hospital contacts                            | Purpose-designed item(s)                                                          | 3 months                     |
| <b>PATIENT CHARACTERISTICS AND OTHER OUTCOMES</b>                                       |                                                                                   |                              |
| <b>Outcomes</b>                                                                         | <b>Instruments</b>                                                                | <b>Timing of measurement</b> |
| Eligibility criteria                                                                    | Registered by an assessor through records, clinical staff, and asking the patient | Screening                    |
| Age                                                                                     | Registered by an assessor                                                         | Screening                    |
| Gender                                                                                  | Registered by an assessor                                                         | Baseline                     |
| CVD-related diagnoses                                                                   | Registered by an assessor through records, clinical staff, and asking the patient | Baseline                     |
| Heart-related procedures                                                                | Registered by an assessor through records, clinical staff, and asking the patient | Baseline                     |

|                                                                                         |                                                                                   |          |
|-----------------------------------------------------------------------------------------|-----------------------------------------------------------------------------------|----------|
| Number of exercise sessions attended during rehabilitation prior to study participation | Registered by an assessor through records, clinical staff, and asking the patient | Baseline |
| Smoking                                                                                 | Patient-reported                                                                  | Baseline |
| Civil status                                                                            | Patient-reported                                                                  | Baseline |
| Employment status                                                                       | Patient-reported                                                                  | Baseline |
| Education                                                                               | Patient-reported                                                                  | Baseline |
| Place of residence: city or countryside                                                 | Patient-reported                                                                  | Baseline |
| Prior exercise and physical activity habits                                             | Patient-reported                                                                  | Baseline |
| Use of walking aid                                                                      | Patient-reported                                                                  | Baseline |
| Physical disabilities                                                                   | Patient-reported                                                                  | Baseline |
| New Your Heart Association (NYHA) Classification                                        | Patient-reported                                                                  | Baseline |
| Medication usage                                                                        | Patient-reported                                                                  | Baseline |
| All-cause mortality                                                                     | Registered by clinical staff                                                      | 3 months |
| *Outcome used in the progression criteria                                               |                                                                                   |          |
